# Supplementary material for: Structural determination of niobium-doped silicon clusters by far-infrared spectroscopy and theory
Source: Royal Society of Chemistry journal article supplement (doi:10.1039/c5cp07298k), 2016-01-01
Supplement: c5cp07298k1.pdf [file c5cp07298k1.pdf]

Electronic supplementary information (ESI)  
**Structural Determination of Niobium-Doped Silicon Clusters by  
Far-infrared Spectroscopy and Theory**

**Xiaojun Li,<sup>a,\*</sup> Pieterjan Claes,<sup>b</sup> Marko Haertelt,<sup>c</sup>  
Peter Lievens,<sup>b</sup> Ewald Janssens,<sup>b,\*</sup> and André Fielicke,<sup>c,d,\*</sup>**

*<sup>a)</sup> The Key Laboratory for Surface Engineering and Remanufacturing in Shaanxi  
Province, School of Chemical Engineering, Xi'an University, Xi'an 710065, Shaanxi Province,  
P. R. China*

*<sup>b)</sup> Laboratory of Solid State Physics and Magnetism, KU Leuven, B-3001 Leuven, Belgium*

*<sup>c)</sup> Fritz-Haber-Institut der Max-Planck-Gesellschaft, Faradayweg 4-6, D-14195 Berlin,  
Germany*

*<sup>d)</sup> Institut für Optik und Atomare Physik, Technische Universität Berlin, Hardenbergstr. 36,  
D-10623 Berlin, Germany*

Contents:

- Comparison of the calculated relative energies without and with inclusion of zero-point vibrational energy (ZPVE) for  $\text{Si}_n\text{Nb}^+$  ( $n = 7, 9, 10, 11$ , and  $12$ ), Table S1
- Average Si–Si and Nb–Si bond distances and coordination numbers of Nb and Si atoms in  $\text{Si}_n\text{Nb}^+$ , as well as a comparison of those variables with  $\text{Si}_n\text{V}^+$ , Table S2
- The natural charge population and natural electron configuration of the Nb dopant in the  $\text{Si}_n\text{Nb}^+$  ( $n = 4$ – $12$ ), Table S3
- Comparison of the calculated (scaled) IR spectra of the low-lying isomers of  $\text{Si}_n\text{Nb}^+$  ( $n = 9$ – $12$ ) and their Ar complexes (BP86/def-SVP level of theory) and a comparison with the corresponding experimental IR-MPD spectrum, Figure S1
- Comparison of experimental IR-MPD spectra of  $\text{Si}_n\text{Nb}^+\text{--Ar}$  ( $n = 4$ – $7$ ) and the corresponding calculated IR spectra of the obtained low-lying isomers, Figures S2–S5
- Total density of states (DOS) and partial density of states (PDOS) of  $\text{Si}_4\text{Nb}^+$  and  $\text{Si}_{11}\text{Nb}^+$  clusters, and the shape of the HOMO and LUMO orbitals for those two clusters (isovalue = 0.02), Figure S6
- Optimized Cartesian coordinates of low-lying isomers of  $\text{Si}_n\text{Nb}^+$  ( $n = 4$ – $12$ ), Tables S4–S12

**Table S1.** Comparison of the calculated relative energies without ( $\Delta E_1$ , eV) and with ( $\Delta E_2$ , eV) inclusion of zero-point vibrational energy (ZPVE) for  $\text{Si}_n\text{Nb}^+$  ( $n = 7, 9, 10, 11$ , and  $12$ ), using the BP86 and B3LYP functionals in conjunction with def-SVP basis sets.

| Cluster                     |      | BP86         |              | B3LYP        |              | Cluster                     |      | BP86         |              | B3LYP        |              |
|-----------------------------|------|--------------|--------------|--------------|--------------|-----------------------------|------|--------------|--------------|--------------|--------------|
|                             |      | $\Delta E_1$ | $\Delta E_2$ | $\Delta E_1$ | $\Delta E_2$ |                             |      | $\Delta E_1$ | $\Delta E_2$ | $\Delta E_1$ | $\Delta E_2$ |
| $\text{Si}_7\text{Nb}^+$    | iso1 | 0.000        | 0.000        | 0.18         | 0.18         | $\text{Si}_9\text{Nb}^+$    | iso1 | 0.00         | 0.00         | 0.00         | 0.00         |
|                             | iso2 | 0.004        | 0.001        | 0.000        | 0.000        |                             | iso2 | 0.09         | 0.07         | 0.14         | 0.13         |
|                             | iso3 | 0.30         | 0.30         | 0.35         | 0.34         |                             | iso3 | 0.09         | 0.07         | 0.20         | 0.18         |
|                             | iso4 | 0.32         | 0.31         | 0.27         | 0.27         |                             | iso4 | 0.15         | 0.15         | 0.08         | 0.08         |
|                             | iso5 | 0.37         | 0.36         | 0.36         | 0.35         |                             | iso5 | 0.21         | 0.19         | 0.29         | 0.27         |
| $\text{Si}_{10}\text{Nb}^+$ | iso1 | 0.000        | 0.000        | 0.000        | 0.000        | $\text{Si}_{11}\text{Nb}^+$ | iso1 | 0.000        | 0.000        | 0.000        | 0.000        |
|                             | iso2 | 0.10         | 0.10         | 0.06         | 0.06         |                             | iso2 | 0.005        | 0.005        | 0.044        | 0.045        |
|                             | iso3 | 0.12         | 0.11         | 0.17         | 0.19         |                             | iso3 | 0.15         | 0.13         | 0.19         | 0.17         |
|                             | iso4 | 0.16         | 0.15         | 0.16         | 0.15         |                             | iso4 | 0.32         | 0.33         | 0.19         | 0.21         |
|                             | iso5 | 0.21         | 0.21         | 0.23         | 0.23         |                             | iso5 | 0.36         | 0.37         | 0.10         | 0.12         |
| $\text{Si}_{12}\text{Nb}^+$ | iso1 | 0.000        | 0.000        | 0.028        | 0.021        |                             |      |              |              |              |              |
|                             | iso2 | 0.12         | 0.11         | 0.14         | 0.11         |                             |      |              |              |              |              |
|                             | iso3 | 0.15         | 0.16         | 0.21         | 0.21         |                             |      |              |              |              |              |
|                             | iso4 | 0.16         | 0.17         | 0.000        | 0.000        |                             |      |              |              |              |              |
|                             | iso5 | 0.26         | 0.26         | 0.10         | 0.10         |                             |      |              |              |              |              |

**Table S2.** Average Si–Si and Nb–Si bond distances ( $R_{\text{Si–Si}}$ ,  $R_{\text{Nb–Si}}$ , Å) and coordination numbers (CNs) of Nb and Si atoms in  $\text{Si}_n\text{Nb}^+$ , as well as a comparison of those variables with  $\text{Si}_n\text{V}^+$ .

| $n$ | $\text{Si}_n\text{Nb}^+$ |                    |          |          | $\text{Si}_n\text{V}^+$ |                   |         |          |
|-----|--------------------------|--------------------|----------|----------|-------------------------|-------------------|---------|----------|
|     | $R_{\text{Si–Si}}$       | $R_{\text{Nb–Si}}$ | CN of Nb | CN of Si | $R_{\text{Si–Si}}$      | $R_{\text{V–Si}}$ | CN of V | CN of Si |
| 4   | 2.5                      | 2.4                | 3.1      | 3.7      | 2.5                     | 2.3               | 3.1     | 3.7      |
| 5   | 2.5                      | 2.5                | 4.1      | 4.0      | 2.5                     | 2.4               | 4.1     | 4.0      |
| 6   | 2.6                      | 2.6                | 5.0      | 4.3      | 2.5                     | 2.5               | 4.0     | 4.6      |
| 7   | 2.5                      | 2.7                | 5.9      | 4.5      | 2.5                     | 2.6               | 5.8     | 4.5      |
| 8   | 2.5                      | 2.7                | 7.0      | 4.6      | 2.5                     | 2.6               | 6.9     | 4.6      |
| 9   | 2.5                      | 2.7                | 7.9      | 4.8      | 2.5                     | 2.6               | 7.8     | 4.8      |
| 10  | 2.5                      | 2.7                | 9.0      | 4.4      | 2.5                     | 2.6               | 7.8     | 4.9      |
| 11  | 2.6                      | 2.8                | 9.8      | 4.8      | --                      | --                | --      | --       |
| 12  | 2.5                      | 2.8                | 9.9      | 4.7      | 2.38                    | 2.7               | 11.6    | 4.1      |

The average bond distances are defined as <sup>1</sup>:

$$\langle R \rangle = \frac{1}{n_b} \sum_{ij} R_{ij} \quad (1)$$

where  $R_{ij}$  is the distance between atoms  $i$  and  $j$  with a given distance cutoff (3.2 Å), and  $n_b$  is the total number of bonds with distances below this cutoff.

The coordination numbers for all atoms are evaluated by the following formula<sup>2</sup>:

$$\text{CN}_A = \sum_{B \neq A} \frac{1}{1 + \exp(-16 * ((4/3)(R_A + R_B)/r_{AB} - 1))} \quad (2)$$

where  $R_A$  and  $R_B$  are scaled covalent radii of A and B atoms, respectively, with values as proposed by Pyykkö and Atsumi,<sup>3</sup> and  $r_{AB}$  is the internuclear distance between A and B.

(1) Rao, B. K.; Jena, P. *J. Chem. Phys.* **1999**, *111*, 1890.

(2) Grimme, S.; Antony, J.; Ehrlich, S.; Krieg, H. *J. Chem. Phys.* **2010**, *132*, 154104.

(3) Pyykkö, P.; Atsumi, M. *Chem. Eur. J.* **2009**, *15*, 186.

**Table S3.** The natural charge population (NCP) and natural electron configuration (NEC) of the Nb dopant in  $\text{Si}_n\text{Nb}^+$  ( $n = 4-12$ ), obtained at the BP86/def-SVP level of theory using the NBO 3.1 program as implemented in the Gaussian software package.

| Cluster                          | NCP on Nb atom<br>( <i>e</i> ) | NEC on Nb atom                                                                                                          |
|----------------------------------|--------------------------------|-------------------------------------------------------------------------------------------------------------------------|
| $\text{Si}_4\text{Nb}^+$         | 0.142                          | [core]4d <sup>4.43</sup> 5s <sup>0.43</sup> 5d <sup>0.02</sup> 6p <sup>0.03</sup>                                       |
| $\text{Si}_5\text{Nb}^+$         | 0.091                          | [core]4d <sup>4.41</sup> 5s <sup>0.47</sup> 5d <sup>0.02</sup> 6p <sup>0.05</sup>                                       |
| $\text{Si}_6\text{Nb}^+$         | −0.165                         | [core]4d <sup>4.64</sup> 5s <sup>0.48</sup> 5d <sup>0.03</sup> 6p <sup>0.06</sup>                                       |
| $\text{Si}_7\text{Nb}^+$         | −0.178                         | [core]4d <sup>4.69</sup> 5s <sup>0.43</sup> 5p <sup>0.02</sup> 5d <sup>0.03</sup> 6p <sup>0.05</sup>                    |
| $\text{Si}_8\text{Nb}^+$         | −0.406                         | [core]4d <sup>4.89</sup> 5s <sup>0.43</sup> 5p <sup>0.06</sup> 5d <sup>0.04</sup> 6p <sup>0.03</sup>                    |
| $\text{Si}_9\text{Nb}^+$ iso1    | −0.408                         | [core]4d <sup>4.89</sup> 5p <sup>0.06</sup> 6s <sup>0.44</sup> 5d <sup>0.04</sup> 6p <sup>0.03</sup>                    |
| $\text{Si}_9\text{Nb}^+$ iso2    | −0.654                         | [core]4d <sup>5.11</sup> 5p <sup>0.06</sup> 6s <sup>0.44</sup> 5d <sup>0.04</sup> 6p <sup>0.04</sup>                    |
| $\text{Si}_{10}\text{Nb}^+$ iso1 | −0.722                         | [core]4d <sup>5.21</sup> 5p <sup>0.07</sup> 6s <sup>0.43</sup> 5d <sup>0.04</sup> 6p <sup>0.01</sup>                    |
| $\text{Si}_{10}\text{Nb}^+$ iso2 | −0.623                         | [core]4d <sup>5.09</sup> 5s <sup>0.44</sup> 5p <sup>0.03</sup> 5d <sup>0.05</sup> 6p <sup>0.05</sup>                    |
| $\text{Si}_{10}\text{Nb}^+$ iso3 | −0.944                         | [core]4d <sup>5.40</sup> 5s <sup>0.45</sup> 5p <sup>0.08</sup> 5d <sup>0.04</sup> 6p <sup>0.01</sup>                    |
| $\text{Si}_{11}\text{Nb}^+$ iso1 | −1.160                         | [core]4d <sup>5.58</sup> 5s <sup>0.43</sup> 5p <sup>0.05</sup> 5d <sup>0.09</sup> 6p <sup>0.04</sup>                    |
| $\text{Si}_{11}\text{Nb}^+$ iso2 | −1.003                         | [core]4d <sup>5.46</sup> 5p <sup>0.09</sup> 6s <sup>0.43</sup> 5d <sup>0.05</sup> 6p <sup>0.01</sup>                    |
| $\text{Si}_{11}\text{Nb}^+$ iso3 | −0.885                         | [core]4d <sup>5.37</sup> 5s <sup>0.41</sup> 5p <sup>0.06</sup> 5d <sup>0.04</sup> 6p <sup>0.03</sup>                    |
| $\text{Si}_{12}\text{Nb}^+$      | −1.034                         | [core]4d <sup>5.48</sup> 5p <sup>0.01</sup> 6s <sup>0.01</sup> 5d <sup>0.06</sup> 6p <sup>0.07</sup> 7s <sup>0.44</sup> |

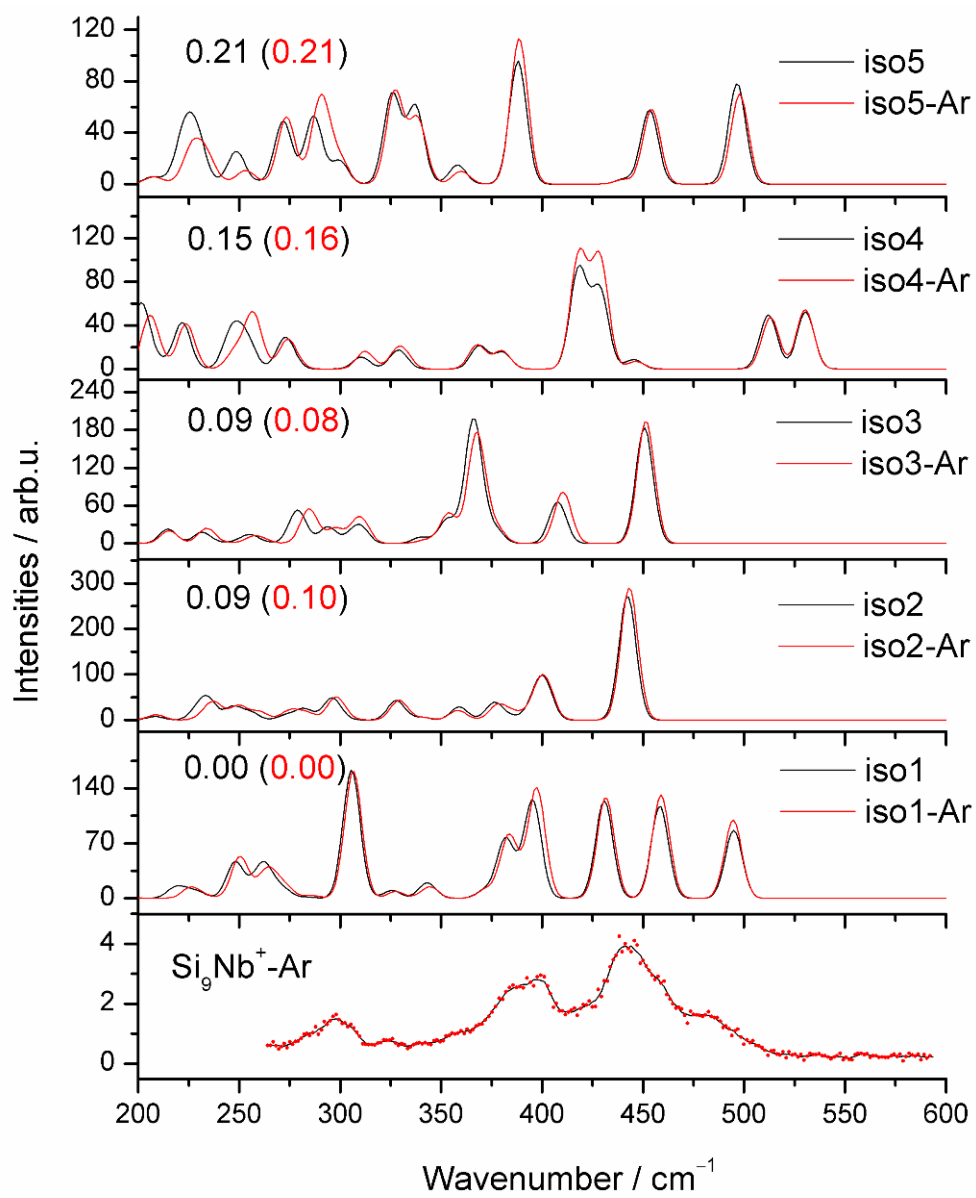

**(a)  $\text{Si}_9\text{Nb}^+$  cluster**

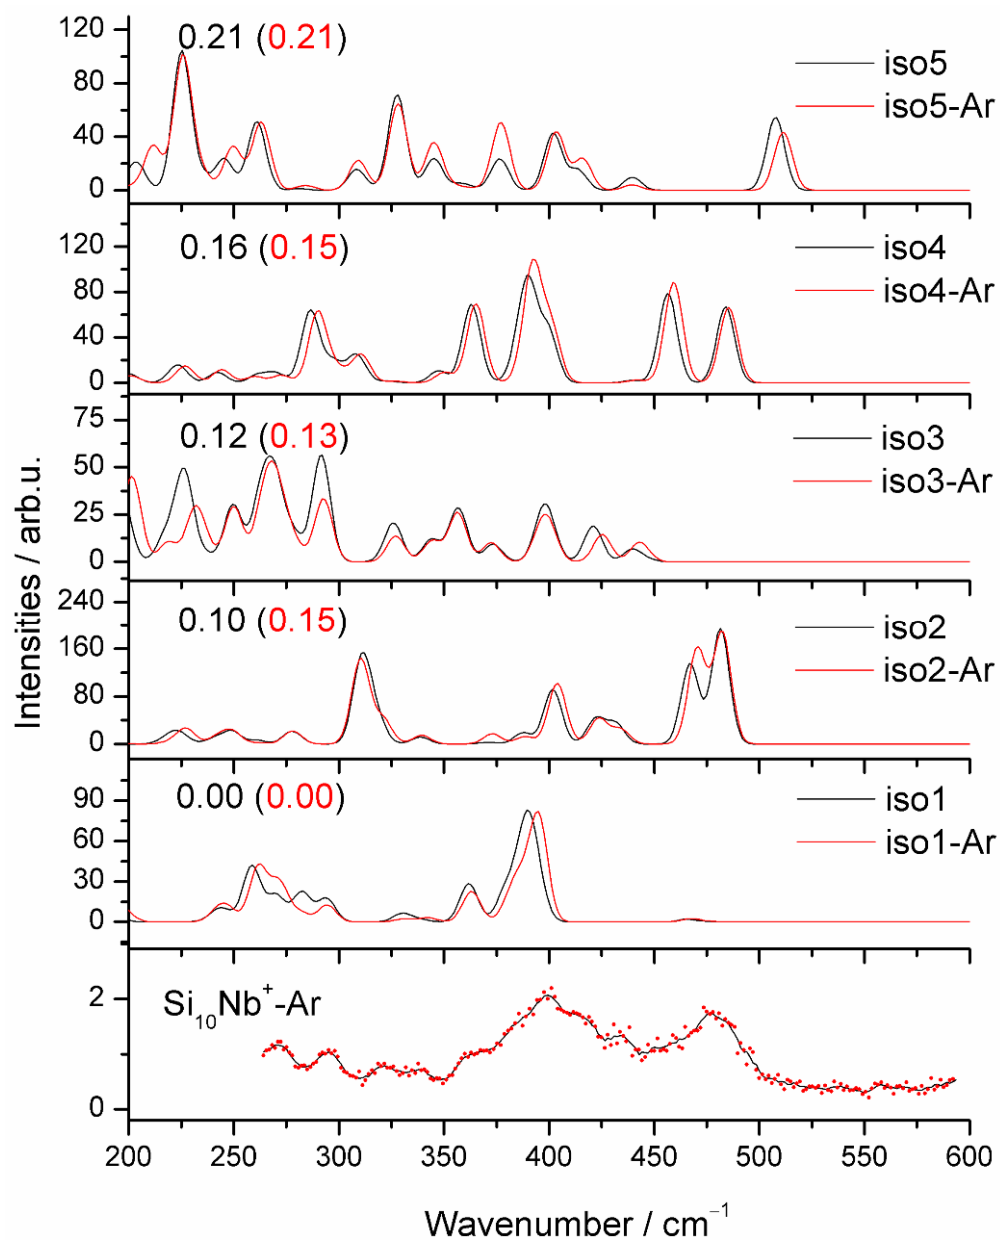

**(b)  $\text{Si}_{10}\text{Nb}^+$  cluster**

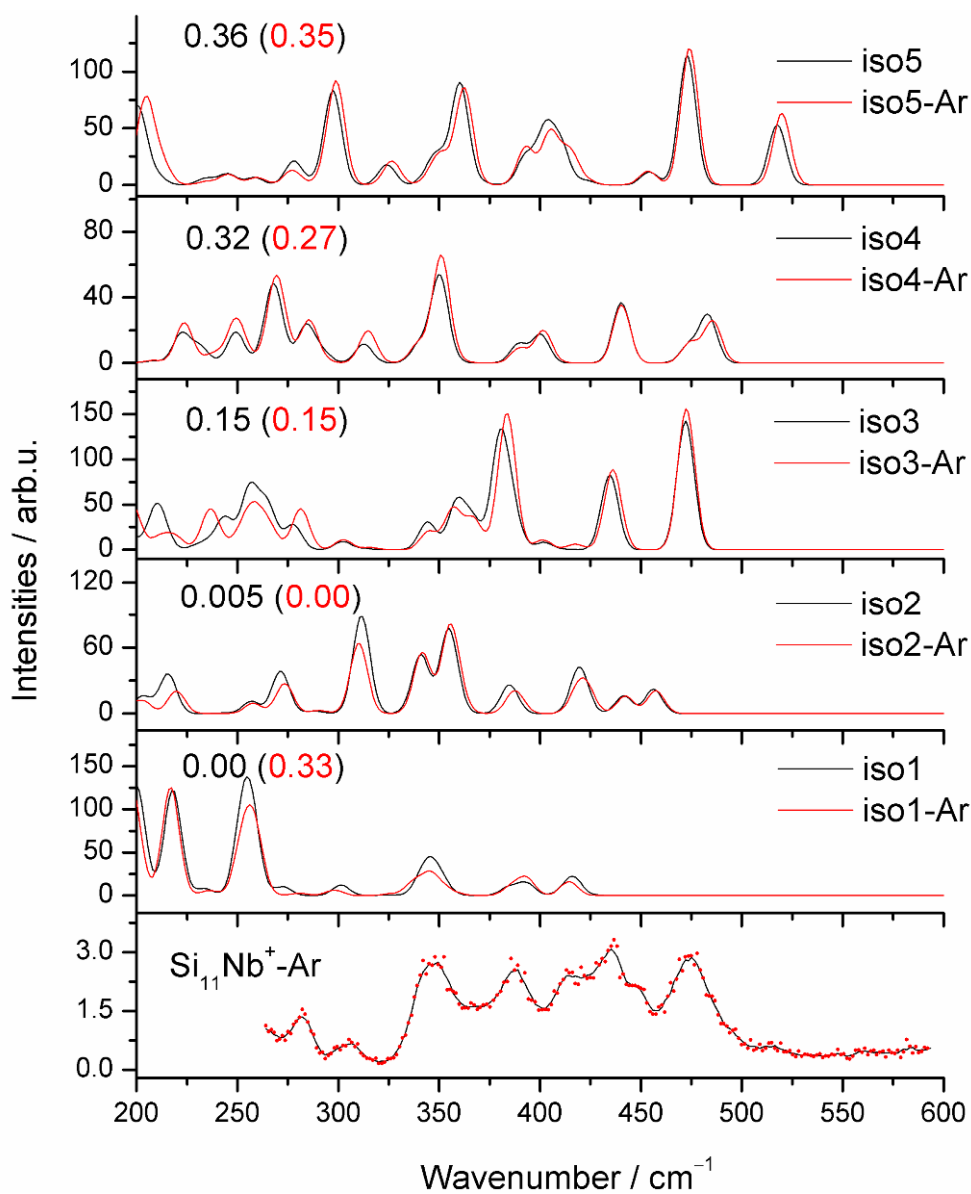

(c)  $\text{Si}_{11}\text{Nb}^+$  cluster

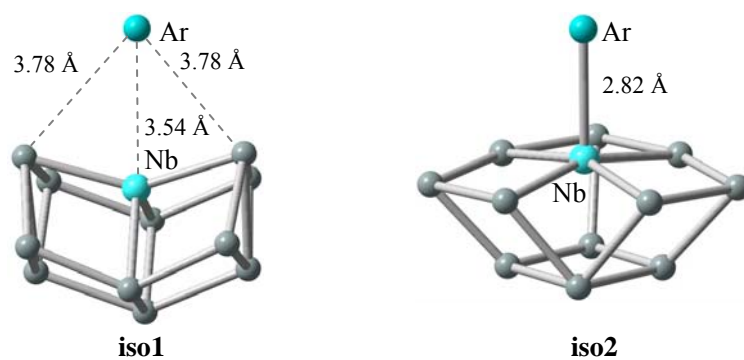

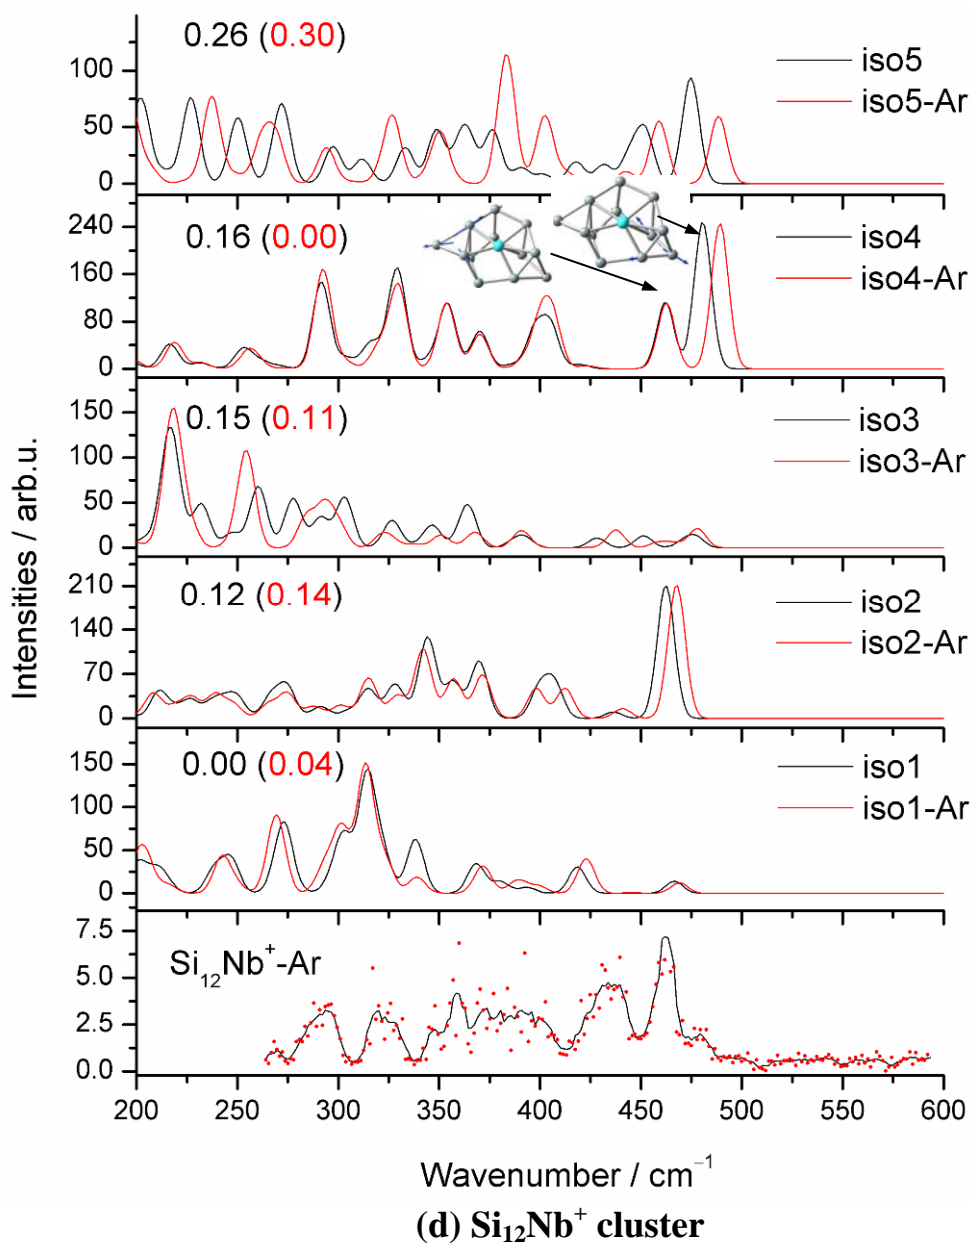

**Figure S1.** The bottom panels show the experimental IR-MPD spectrum of Si<sub>n</sub>Nb<sup>+</sup>-Ar ( $n = 9-12$ ). The upper panels show the (scaled) IR spectra of the low-lying isomers of Si<sub>n</sub>Nb<sup>+</sup> ( $n = 9-12$ ) and their Ar complexes as calculated at the BP86/def-SVP level of theory. The relative energies without (black) and with (red) Ar atom are given also. Calculated spectra are convoluted by a Gaussian line shape with a full width at half-maximum (FWHM) of 10 cm<sup>-1</sup>. The scaling factor of 1.04 was applied to correct all calculated vibrational spectra.



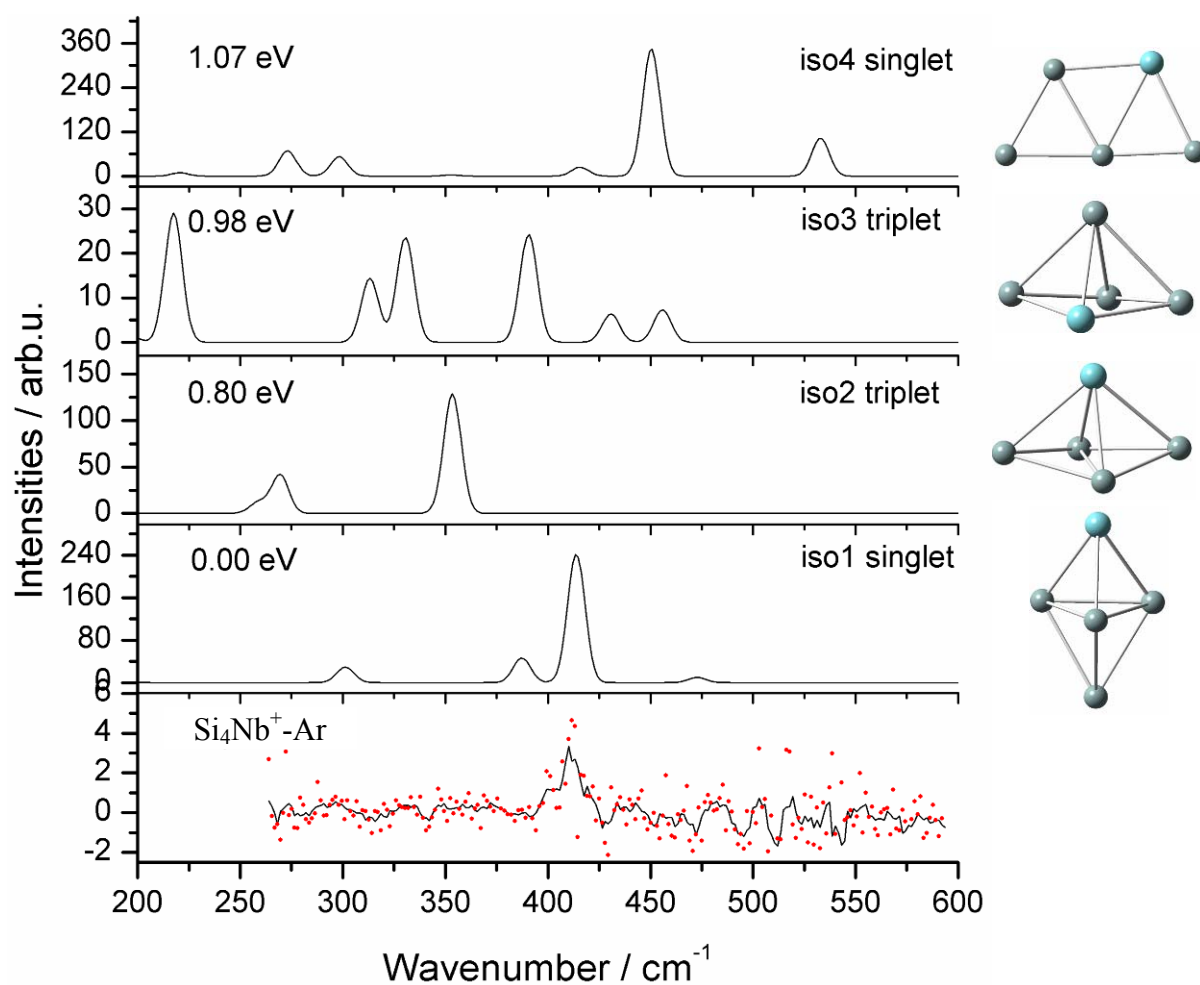

**Figure S2.** Comparison of experimental IR-MPD spectrum (lower) of  $\text{Si}_4\text{Nb}^+-\text{Ar}$  and the corresponding calculated IR spectra (upper) of the low-lying isomers. The relative energies obtained at the BP86/def-SVP level of theory were given.

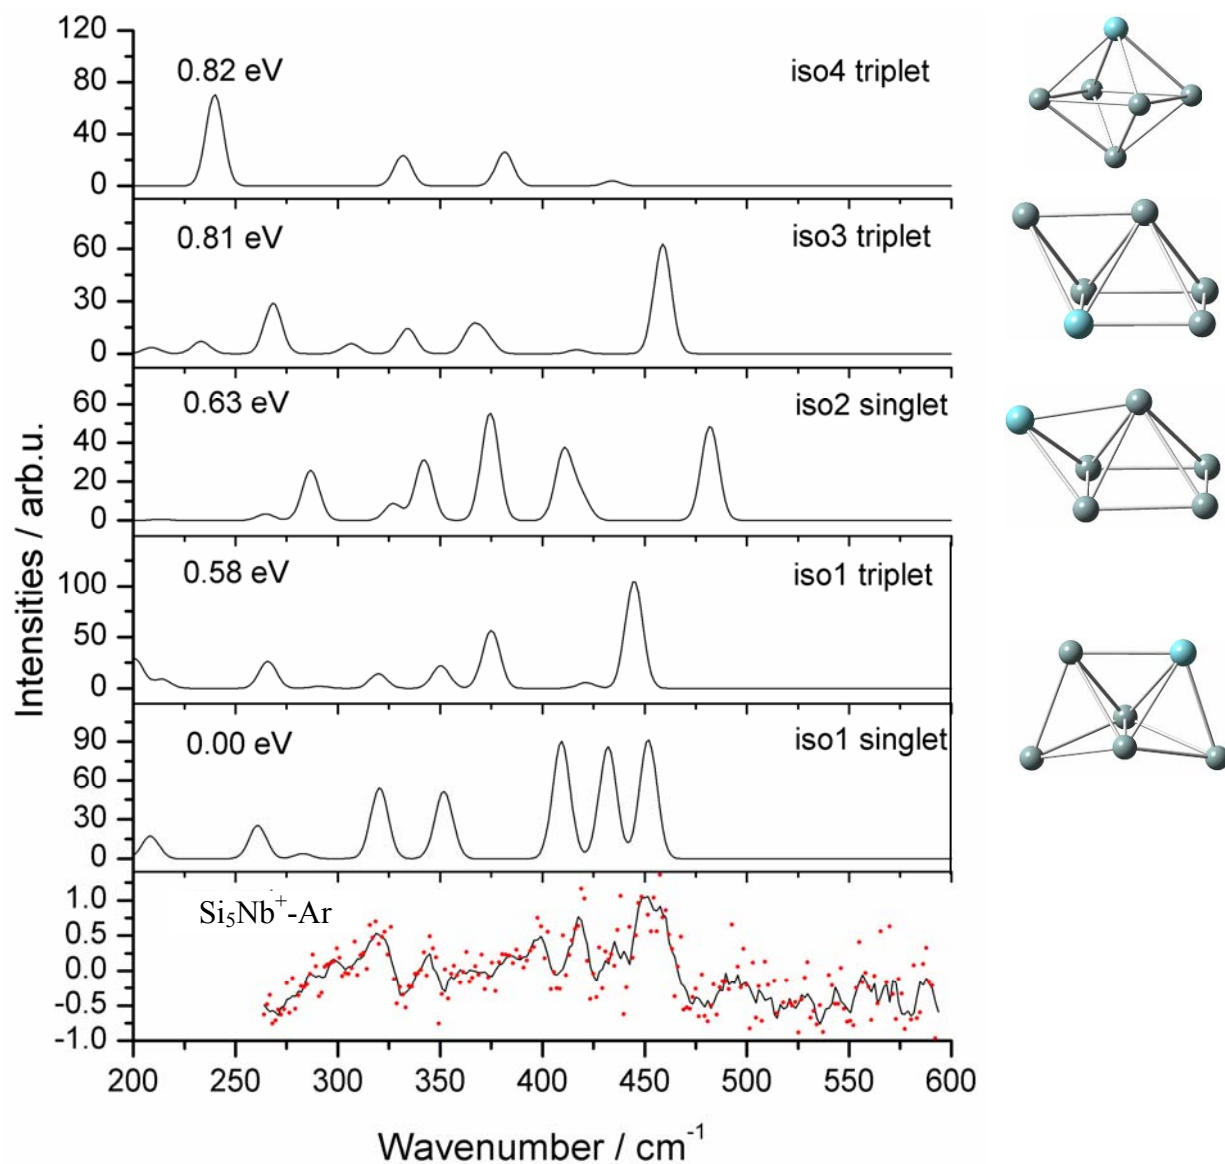

**Figure S3.** Comparison of experimental IR-MPD spectrum (lower) of  $\text{Si}_5\text{Nb}^+-\text{Ar}$  and the corresponding calculated IR spectra (upper) of the low-lying isomers. The relative energies are given at the BP86/def-SVP level of theory .

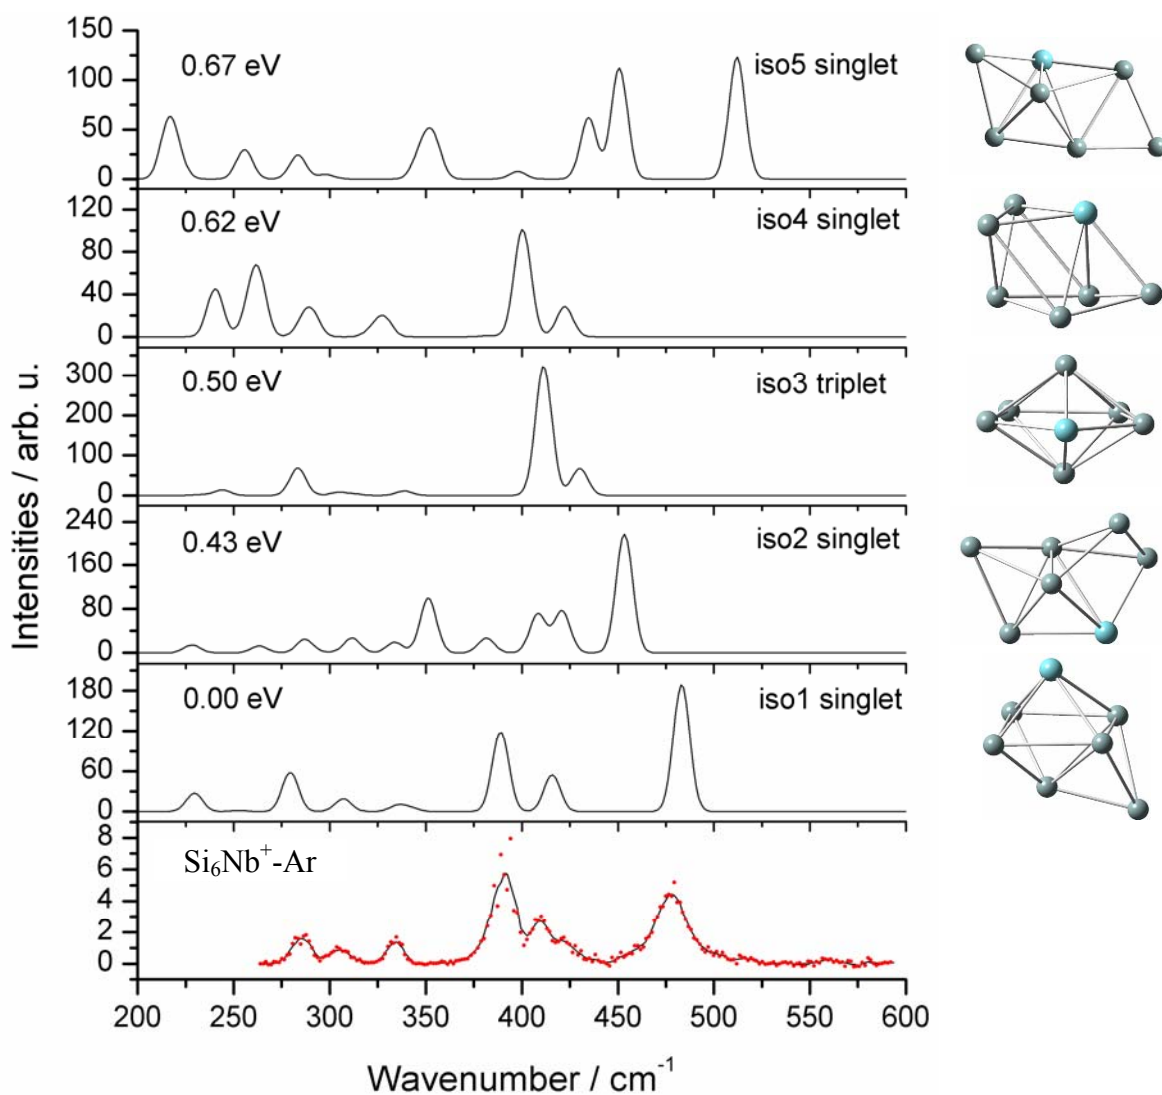

**Figure S4.** Comparison of experimental IR-MPD spectrum (lower) of  $\text{Si}_6\text{Nb}^+-\text{Ar}$  and the corresponding calculated IR spectra (upper) of the low-lying isomers. The relative energies obtained at the BP86/def-SVP level of theory are given.

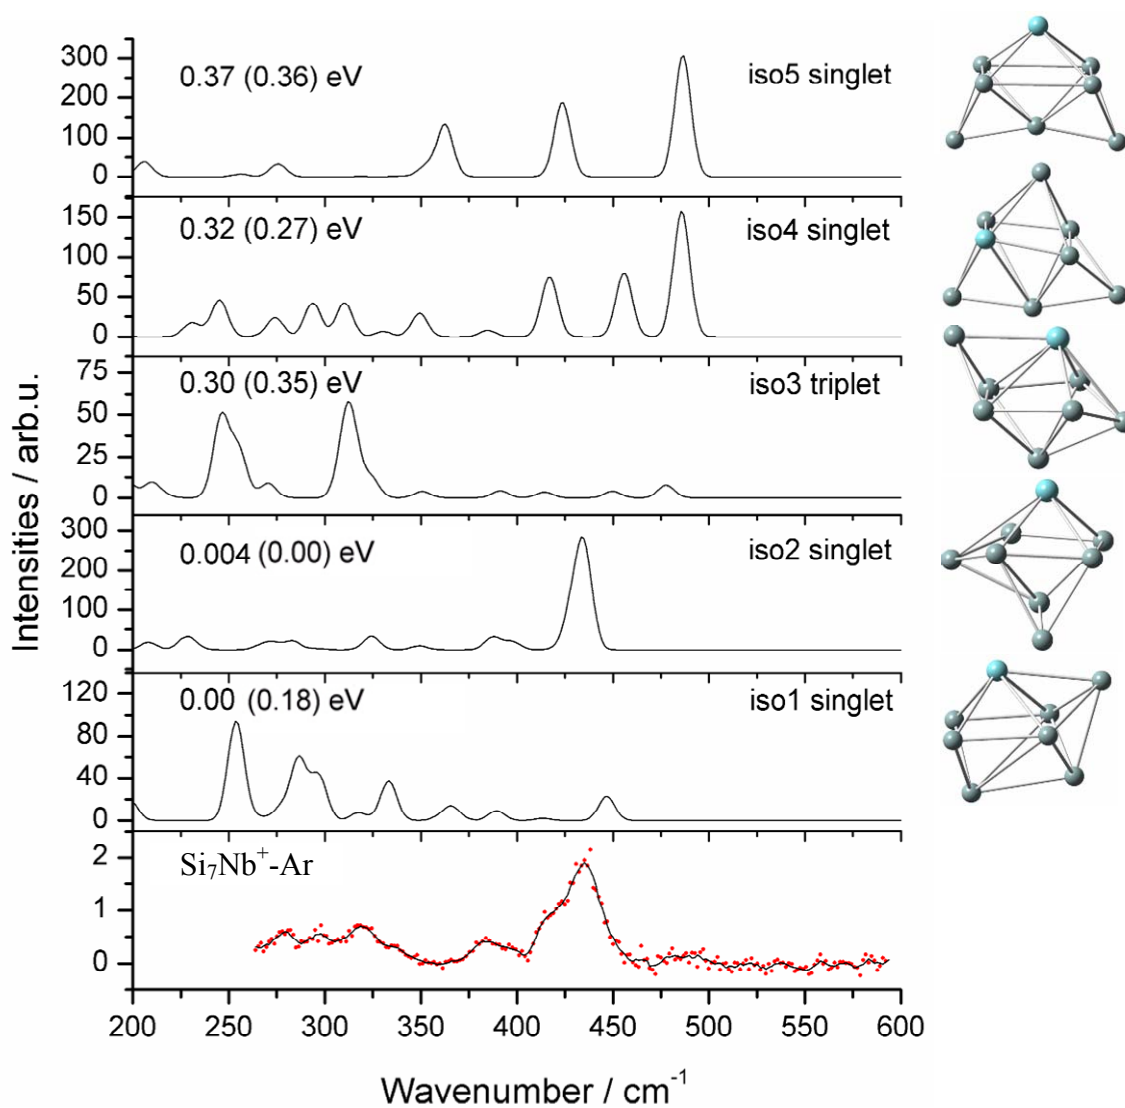

**Figure S5.** Comparison of experimental IR-MPD spectrum (lower) of  $\text{Si}_7\text{Nb}^+-\text{Ar}$  and the corresponding calculated IR spectra (upper) of the low-lying isomers. The relative energies are calculated at the BP86/def-SVP level of theory and at the B3LYP/def-SVP level (in parentheses).

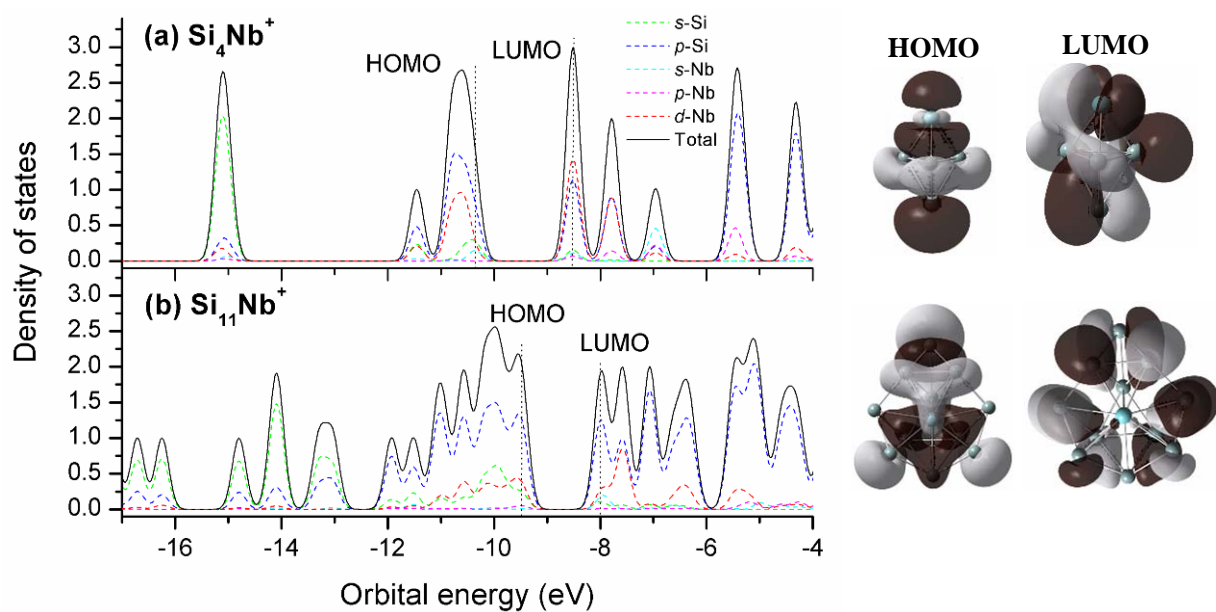

**Figure S6.** Total density of states (DOS) and partial density of states (PDOS) of (a)  $\text{Si}_4\text{Nb}^+$  and (b)  $\text{Si}_{11}\text{Nb}^+$  obtained at the BP86/def-SVP level of theory. The shapes of the HOMO and LUMO for those two clusters (isovalue = 0.02) are shown on the right.

**Table S4.** Cartesian coordinates (in Å) of the four lowest energy isomers of  $\text{Si}_4\text{Nb}^+$ .

iso1 singlet

Nb, 0. , -0. 0000000014, -1. 4121149269  
Si, 0. , -0. 0000000014, 2. 5768155479  
Si, -0. 0000000032, 1. 4397931085, 0. 5111268415  
Si, -1. 2468974078, -0. 7198965592, 0. 5111268415  
Si, 1. 246897411, -0. 7198965537, 0. 5111268415

iso2 triplet

Nb, 0. , 0. , 1. 0702147263  
Si, 1. 4118726444, 0. , -0. 954359202  
Si, 0. , 1. 9630206038, -0. 6236194563  
Si, 0. , -1. 9630206038, -0. 6236194563  
Si, -1. 4118726444, 0. , -0. 954359202

iso3 triplet

Nb, 0. 2040368806, 1. 1762673132, 0.  
Si, 0. 2107910332, -0. 5221654579, -1. 791762093  
Si, -1. 6461696367, -0. 4066030871, 0.  
Si, 0. 5813074996, -1. 9368201103, 0.  
Si, 0. 2107910332, -0. 5221654579, 1. 791762093

iso4 singlet

Nb, 1. 1498526534, 0. 6563228031, 0.  
Si, 1. 4856545777, -1. 737496669, 0.  
Si, -2. 9629448527, -0. 3453214983, 0.  
Si, -1. 1835632264, 1. 2582718897, 0.  
Si, -0. 704165622, -1. 1061689055, 0.

**Table S5.** Cartesian coordinates (in Å) of the five low-lying isomers of  $\text{Si}_5\text{Nb}^+$ .

iso1 singlet

Nb, -1. 3068401126, 0. 5696689633, 0.  
Si, 0. 591563625, -0. 5486084228, -1. 237894662  
Si, 0. 9520874898, 1. 5787749602, 0.  
Si, 0. 591563625, -0. 5486084228, 1. 237894662  
Si, -1. 0309917396, -1. 8998889507, 0.  
Si, 2. 7065452623, -0. 2536769712, 0.

iso1 triplet

Nb, 1. 3616738174, -0. 4808332162, 0.  
Si, -0. 6235279753, 0. 5230888809, 1. 2971489399  
Si, -0. 8069174659, -1. 6532207728, 0.  
Si, -2. 6197842142, -0. 0131409472, 0.  
Si, 0. 6553455685, 2. 0745010328, 0.  
Si, -0. 6235279753, 0. 5230888809, -1. 2971489399

iso2 singlet

Nb, 0. 0696264527, -1. 7262302984, 0.  
Si, -0. 8465000523, 0. 0466665418, -1. 2977119251

Si, 0.0162167753, 2.3087751335, 1.2295805091  
 Si, 0.0162167753, 2.3087751335, -1.2295805091  
 Si, -0.8465000523, 0.0466665418, 1.2977119251  
 Si, 1.251024114, 0.4260886767, 0.

**iso3 triplet**

Nb, 0.0279164367, 0.6897201706, 0.7335749932  
 Si, -0.1813105139, -0.1102058236, -1.5634186236  
 Si, 1.048638338, -2.0169070465, -0.8383711126  
 Si, 1.3746998026, -1.3231087918, 1.451275726  
 Si, -0.9939739859, -1.7230998874, 0.3548557244  
 Si, -0.7369600776, -0.9239986215, 2.5570652927

**iso4 triplet**

Nb, 1.1677090842, 0.7106163661, -0.1196074392  
 Si, -0.2097659523, -0.8704848617, 1.2886097837  
 Si, -0.3733976274, 0.573847583, -2.0080232822  
 Si, 0.6077062112, -1.6903183958, -1.0846502472  
 Si, -1.6203655124, -0.9516438056, -0.6693955467  
 Si, 2.0603047967, -1.5118078859, 0.7626287316

**Table S6.** Cartesian coordinates (in Å) of the five low-lying isomers of  $\text{Si}_6\text{Nb}^+$ .

**iso1 singlet**

Nb, -1.2972788352, -0.6910892737, 0.  
 Si, -0.8556935648, 1.2790230898, -1.4895961026  
 Si, 0.8215652827, -0.8878850198, -1.2546937231  
 Si, 1.0024261426, 1.3579676736, 0.  
 Si, -0.8556935648, 1.2790230898, 1.4895961026  
 Si, 0.8215652827, -0.8878850198, 1.2546937231  
 Si, 2.8651902468, -0.11775463, 0.

**iso2 singlet**

Nb, -0.0659701647, 0.4980741569, 0.9375340254  
 Si, -1.9422078773, 1.1062337059, -0.6529797838  
 Si, -1.0152171001, 1.9757287779, -2.8131920913  
 Si, -1.6590101938, 2.9955105835, 0.8477961623  
 Si, 0.5992988373, 2.7536811059, 1.7149231665  
 Si, 0.1885307744, 0.1737905024, -1.491505227  
 Si, 0.1417417242, 2.5476181676, -0.7493122523

**iso3 triplet**

Nb, 0., 0., -1.79743245  
 Si, 0., 1.34655201, 2.23054855  
 Si, -1.322551, 0., 0.57068055  
 Si, 0., -1.908459, -0.16927445  
 Si, 1.322551, 0., 0.57068055  
 Si, 0., -1.34655201, 2.23054855  
 Si, 0., 1.908459, -0.16927445

**iso4 singlet**

Nb, -1.0521750569, -0.5114856921, 0.  
Si, -0.7352653365, 1.5724000798, -1.3179981331  
Si, 1.2756552348, -0.4240231354, -1.4045000042  
Si, -0.7352653365, 1.5724000798, 1.3179981331  
Si, 1.2756552348, -0.4240231354, 1.4045000042  
Si, 1.2758464027, 1.5157046577, 0.  
Si, 0.724470905, -2.3143858919, 0.

**iso5 singlet**

Nb, 0.6927608211, 0.9223746531, 0.682732811  
Si, -0.825825526, 0.4327969498, -1.6664877053  
Si, -1.3606797128, 0.9064708774, 2.0748643487  
Si, -1.3045790499, 2.2030732091, -0.1567559007  
Si, 0.8981388498, -0.4225309375, -3.0260952706  
Si, 0.9974116841, -1.0123584788, -0.7560201255  
Si, -1.7576300662, -0.5110692731, 0.2674688424

**Table S7.** Cartesian coordinates (in Å) of the five low-lying isomers of  $\text{Si}_7\text{Nb}^+$ .

**iso1 singlet**

Nb, 1.2054177771, 0.1575557602, 0.  
Si, 0.3692760062, -1.4387529091, 1.7773558054  
Si, -0.5375062798, 0.6939866781, 1.9346969435  
Si, -1.1939329802, -1.7353034683, 0.  
Si, -0.5375062798, 0.6939866781, -1.9346969435  
Si, 0.3692760062, -1.4387529091, -1.7773558054  
Si, -1.942022686, 0.6839112778, 0.  
Si, -0.1386498136, 2.3217989523, 0.

**iso2 singlet**

Nb, 0.5862261882, 1.6253681716, 1.3340207306  
Si, 1.2537485736, 0.6990486538, -0.9329815078  
Si, -0.2412054646, -1.1918830896, -1.5986899677  
Si, -1.078989877, 0.5984084742, -0.118547021  
Si, 2.8329093242, -0.3288906296, 0.5322941128  
Si, -0.6085714218, -0.1224861337, 2.6317261766  
Si, 1.8559835712, -0.333694276, 2.7006228008  
Si, 0.5138281064, -1.2531251706, 0.7544726756

**iso3 triplet**

Nb, 1.1989964583, -0.0753434068, 0.  
Si, 0.0525953201, 0.9323552119, -2.0708625833  
Si, -0.0680061624, 2.313826375, 0.  
Si, -0.971937407, -1.0913299634, -1.4767857932  
Si, 0.0525953201, 0.9323552119, 2.0708625833  
Si, 0.1890532842, -2.4798929817, 0.  
Si, -0.971937407, -1.0913299634, 1.4767857932



Si, -1.8026464964, 0.7095586666, 0.

**iso4 singlet**

Nb, -0.1178443601, 0.604511808, 0.9281567721  
Si, 0.7505234675, -1.7243939681, 0.3631263824  
Si, -1.740328754, -1.3579601981, 0.512059187  
Si, 0.2955180029, -0.4893219824, -1.5587481355  
Si, -0.8577004991, 0.778872748, -3.3055628241  
Si, -2.2198876203, 0.0288355446, -1.4295498871  
Si, -2.4957902857, 1.3702344971, 0.489891812  
Si, -0.437810951, 1.8859625508, -1.1545063067

**iso5 singlet**

Nb, 0., 0., -1.5773169399  
Si, -1.2675209755, 1.5887637379, -0.1194029221  
Si, 0., 2.3788101917, 1.8432204514  
Si, -1.2675209755, -1.5887637379, -0.1194029221  
Si, 0., -2.3788101917, 1.8432204514  
Si, 1.2675209755, 1.5887637379, -0.1194029221  
Si, 1.2675209755, -1.5887637379, -0.1194029221  
Si, 0., 0., 1.3991537034

**Table S8.** Cartesian coordinates (in Å) of the five low-lying isomers of  $\text{Si}_8\text{Nb}^+$ .

**iso1 singlet**

Nb, 0.9055431095, 0.5664374572, 1.0928890301  
Si, 1.2023335619, -1.7105802771, -0.1932360675  
Si, -0.9601990165, -2.7658893554, -0.6972124864  
Si, -0.6872690533, -1.871295626, 1.5974372293  
Si, 1.7009669405, -1.6775023877, 2.4438504763  
Si, -1.6497590006, 0.3722479147, 1.8085812684  
Si, -0.0057998007, -0.4243298597, 3.4714130521  
Si, 3.1619880193, -0.8011040275, 0.7602227598  
Si, -0.7553587601, -0.3027658384, -0.5219572619

**iso2 singlet**

Nb, 1.0556094416, -0.371295033, 0.  
Si, -0.6724207995, 1.2940614029, -1.8390887038  
Si, -1.0018975228, -1.5540030749, 1.2089679786  
Si, 0.7587613976, -0.4547650432, 2.5389327649  
Si, 0.604835751, 2.1047936949, 0.  
Si, -0.6724207995, 1.2940614029, 1.8390887038  
Si, 0.7587613976, -0.4547650432, -2.5389327649  
Si, -1.0018975228, -1.5540030749, -1.2089679786  
Si, -1.8793764934, 0.4024877788, 0.

**iso3 singlet**

Nb, -0.7547568862, 0.8605197984, -0.9410325604  
Si, 0.9831905211, -1.2956660234, 1.0651799068

Si, 3.1460000066, -0.5522930855, 0.3687905553  
 Si, 1.3386162075, -0.4258855438, -1.3927151668  
 Si, -0.6593263003, -1.8076796251, -0.5518890923  
 Si, 1.4397581463, 1.185452094, 0.4724702177  
 Si, -2.6443475598, -0.7321750629, -0.0282451724  
 Si, -1.1436583574, -0.2958628348, 1.7850033217  
 Si, -0.5713507778, 2.038165283, 1.2692549904

**iso4 singlet**

Nb, 0.757131336, -1.3749721323, 0.  
 Si, -1.1957519862, -0.0612600632, 1.3524210148  
 Si, -0.3813542295, 1.977097615, 2.3653104102  
 Si, 1.2592821095, 0.2527164172, 1.7989932844  
 Si, -1.1957519862, -0.0612600632, -1.3524210148  
 Si, -1.8077382437, -1.892177159, 0.  
 Si, -0.3813542295, 1.977097615, -2.3653104102  
 Si, 0.2298648539, 1.5715593797, 0.  
 Si, 1.2592821095, 0.2527164172, -1.7989932844

**iso5 singlet**

Nb, 0.3482871877, 1.3612138059, 0.  
 Si, -1.0066919896, -0.2781825255, 1.6910341362  
 Si, 2.6195365066, -1.140612815, 0.  
 Si, 1.3026330659, -0.0383815556, 1.8510172798  
 Si, 0.3094765184, -1.5668503258, 0.  
 Si, -1.0066919896, -0.2781825255, -1.6910341362  
 Si, -2.3316230501, -1.6473944684, 0.  
 Si, -2.1988741151, 1.0254366956, 0.  
 Si, 1.3026330659, -0.0383815556, -1.8510172798

**Table S9.** Cartesian coordinates (in Å) of the five low-lying isomers of  $\text{Si}_9\text{Nb}^+$ .

**iso1 singlet**

Nb, 0.7596944337, 0.1726515044, 0.9822437344  
 Si, 0.6475688644, 1.4851426335, -1.1267987524  
 Si, -1.6558965766, 0.4745966647, 1.9256904137  
 Si, -1.1102523556, 0.9265057794, -2.763246999  
 Si, -2.8232771366, -1.7864874243, 2.2941022617  
 Si, -1.5798398616, 0.7732571394, -0.3997415201  
 Si, 0.8674998637, -2.3163552033, 0.3018824103  
 Si, -0.3804014464, -1.5783621191, 2.4733124167  
 Si, -1.5680117263, -1.6298357883, 0.2559562768  
 Si, 0.0534069411, -0.9456631864, -1.494473242

**iso2 singlet**

Nb, 1.7676535154, 0.8441029483, 0.2245554321  
 Si, -0.7139276969, -0.3020529698, -0.6383316195  
 Si, 0.9515665062, -1.5291166545, 0.7331339855

Si, 1.6885066085, -0.9190413692, -1.5876728587  
Si, 1.6237701718, -0.2201567943, 2.7331193554  
Si, 0.7390533071, 2.0151224476, 2.2856062536  
Si, 0.4211514556, 1.449391308, -1.9376720039  
Si, -0.1539677, -2.5841138378, -1.2720131744  
Si, -0.7506134906, 0.0633203728, 1.8641277852  
Si, -0.6897316772, 2.0592525489, 0.2358398447

**iso3 singlet**

Nb, 1.1695191286, 0.4736910088, 0.  
Si, 0.8057922381, -1.7463817646, 1.2149597958  
Si, -1.8722025727, 1.3626310587, 0.  
Si, -0.627328323, 0.1707945699, 2.0491894153  
Si, 0.0530715716, 2.4276386404, 1.2864593749  
Si, -1.3499737078, -1.0689449456, 0.  
Si, 0.8057922381, -1.7463817646, -1.2149597958  
Si, -0.627328323, 0.1707945699, -2.0491894153  
Si, -0.6827178437, -3.3808911225, 0.  
Si, 0.0530715716, 2.4276386404, -1.2864593749

**iso4 singlet**

Nb, 0.10932173, 0.8364063245, 1.106746733  
Si, -0.4029002195, -1.7015388933, 0.6553123225  
Si, -0.6153510901, 0.6660493013, -3.3963476402  
Si, -0.1896993227, 1.9158358037, -1.314953082  
Si, 0.1021635598, -0.7044674187, -1.4641040203  
Si, -2.2073926241, -0.3250448519, 0.4198050274  
Si, -2.4780682606, 0.9120667614, -1.9883836024  
Si, -4.0530510089, 1.0530342793, -0.2559561153  
Si, -1.944018317, 2.0826264709, 0.4772437358  
Si, 1.8304905532, 0.8340592229, -0.7192333584

**iso5 singlet**

Nb, 1.4289536196, 0.5378092103, 0.3957061987  
Si, -2.7361750912, 1.927732122, -0.0624055198  
Si, -0.3497244498, 2.4241788573, 0.9674751434  
Si, 0.0829336565, -0.9418466155, -1.2161590874  
Si, -0.7715828149, 1.5102834463, -1.5115408212  
Si, 1.3158179858, 0.9632405761, -2.3271996517  
Si, -1.145010377, -0.0769823219, 0.6097331754  
Si, -2.2134260191, 1.4222328736, 2.3093786124  
Si, 0.1502083801, 0.6248953024, 2.6295519707  
Si, 1.2952941102, 2.8710325494, -0.6708080207

**Table S10.** Cartesian coordinates (in Å) of the five low-lying isomers of  $\text{Si}_{10}\text{Nb}^+$ .

**iso1 singlet**

Nb, 0.9388523824, -0.2232777824, 0.

Si, 0.0278179142, 2.1040818405, 2.3615879776  
 Si, -0.8254269969, -1.7888549013, 1.7819730988  
 Si, 0.3419483097, -2.8159333209, 0.  
 Si, -1.4850787476, 0.4710327868, 1.2341986441  
 Si, -1.4850787476, 0.4710327868, -1.2341986441  
 Si, 0.1026889608, 2.2710610682, 0.  
 Si, 0.6722338395, -0.2036193141, 2.5704275728  
 Si, 0.0278179142, 2.1040818405, -2.3615879776  
 Si, 0.6722338395, -0.2036193141, -2.5704275728  
 Si, -0.8254269969, -1.7888549013, -1.7819730988

#### iso2 singlet

Nb, 1.0061644516, 0.5094155656, 0.7841628245  
 Si, -0.2151415463, -1.325753022, -0.5967593519  
 Si, 2.5101616008, -0.8888730453, 2.2825777601  
 Si, 0.1269451452, 0.9283336308, -1.5633576691  
 Si, -1.6593502629, 0.6438149483, 0.1994520967  
 Si, -1.9318457003, -0.2484046973, -2.0911569946  
 Si, -3.0944903228, 0.3801537285, 2.1190305872  
 Si, -0.7472914548, 1.3176221902, 2.4608481476  
 Si, -1.2386411855, -1.1553896472, 2.0455296889  
 Si, 0.5613231032, -0.4195912638, 3.5395091917  
 Si, 0.7745001718, -2.3495273878, 1.285011719

#### iso3 singlet

Nb, -0.016689, 0.105611, 0.943219  
 Si, -1.696786, 2.086814, 0.731243  
 Si, -0.409506, 1.774712, -1.263641  
 Si, -1.823781, -1.741139, 0.806857  
 Si, 1.315526, -0.002506, -1.535835  
 Si, -2.773559, 0.173994, -0.184229  
 Si, 1.803037, -1.706107, 0.685837  
 Si, 3.099149, 0.184677, 0.103607  
 Si, -0.057595, -2.504705, -0.562588  
 Si, -1.010265, -0.634941, -1.773517  
 Si, 1.602655, 2.059912, 0.229982

#### iso4 singlet

Nb, 1.5453298265, 0.7518961986, 0.2581290487  
 Si, -0.3020474153, 0.1314363047, 1.9696334274  
 Si, -1.2471586151, 0.9106463805, -0.584021528  
 Si, -0.303972098, -1.4294081174, -0.2366228489  
 Si, 0.8647252215, -1.9213473826, 1.9078028157  
 Si, 2.2130506821, -1.7880205908, -0.1122456259  
 Si, 0.1823544882, 1.6689992361, -2.4258947309  
 Si, 1.2963985836, -0.4327594898, -1.9639534678  
 Si, -1.0277274647, 2.3227946271, 1.4184144153

Si, 0.4056672656, 2.9217778531, -0.4561816897  
 Si, 0.9206485256, -2.7849570196, -1.9937198159

iso5 singlet

Nb, -1.2538089255, -1.1713429421, 0.  
 Si, -0.5843563732, 3.6532124914, 0.  
 Si, 1.2832044661, -1.7003648245, 1.4130808168  
 Si, -0.2832339924, 0.0964290455, -1.9400468215  
 Si, -1.1693366273, 1.4392759453, 0.  
 Si, -0.2832339924, 0.0964290455, 1.9400468215  
 Si, 0.174986769, -3.254617551, 0.  
 Si, 0.9119014881, 2.2593491675, -1.4890938805  
 Si, 1.2832044661, -1.7003648245, -1.4130808168  
 Si, 1.4400272834, 0.2745100995, 0.  
 Si, 0.9119014881, 2.2593491675, 1.4890938805

**Table S11.** Cartesian coordinates (in Å) of the five low-lying isomers of  $\text{Si}_{11}\text{Nb}^+$ .

iso1 singlet

Nb, 0., 0., 0.7410137145  
 Si, -2.1902641161, 1.9435748134, 0.2065746844  
 Si, -2.3504290861, 0., -1.158456595  
 Si, -2.1902641161, -1.9435748134, 0.2065746844  
 Si, 2.1902641161, -1.9435748134, 0.2065746844  
 Si, 2.1902641161, 1.9435748134, 0.2065746844  
 Si, 0., 0., -2.1404757786  
 Si, 2.3982098097, 0., 1.5555528281  
 Si, 2.3504290861, 0., -1.158456595  
 Si, 0., 2.0574323225, -0.8113976798  
 Si, 0., -2.0574323225, -0.8113976798  
 Si, -2.3982098097, 0., 1.5555528281

iso2 singlet

Nb, 0.1173331557, -0.2633468017, 1.0407266456  
 Si, -1.7403459531, 1.4956387993, 1.2720387042  
 Si, 2.0130431313, 1.4501306646, 1.1099314257  
 Si, -1.5505583626, 0.2705662575, -1.1758001587  
 Si, 0.5762259441, -3.2032008914, -0.3597059776  
 Si, 2.2364564958, -1.4498630877, 0.2432321608  
 Si, -1.4630151499, -2.103951709, 0.1962373244  
 Si, -3.0902124126, -0.4168811665, 0.7275752196  
 Si, 0.0682577698, 1.9715953796, -0.6927018419  
 Si, 0.3103488979, -1.1704761415, -1.6317329959  
 Si, 2.0053926388, 0.5321972654, -1.1344774263  
 Si, 0.0987771349, 2.9939652416, 1.4923693003

iso3 singlet

Nb, 0.9753630931, -0.3053006788, 0.

Si, -1.6350701267, -0.9317917337, -1.2813533698  
Si, 0.5678963579, -1.8859336975, -2.0372760463  
Si, 0.0850644154, 0.3281639894, -2.7507950659  
Si, -1.6350701267, -0.9317917337, 1.2813533698  
Si, -0.7673901172, 3.5384172788, 0.  
Si, 0.5678963579, -1.8859336975, 2.0372760463  
Si, 0.0850644154, 0.3281639894, 2.7507950659  
Si, -1.3141984402, 1.1312012903, 0.  
Si, -0.3445358734, -2.8556960723, 0.  
Si, 0.7786788449, 2.0242851448, -1.2119636433  
Si, 0.7786788449, 2.0242851448, 1.2119636433

**iso4 singlet**

Nb, 1.1162032251, 1.5452389168, 0.  
Si, -1.605585432, 0.4907309245, 0.  
Si, -1.5913195688, 2.8388537835, 0.  
Si, 0.2593404197, -0.3864652749, 1.6104711608  
Si, 0.2593404197, -0.3864652749, -1.6104711608  
Si, -0.5189254325, 1.780111101, 1.9700798126  
Si, -1.6998009096, -1.9758731444, 0.  
Si, -0.4701463568, -2.6376560122, -2.026673327  
Si, -0.5189254325, 1.780111101, -1.9700798126  
Si, -0.4701463568, -2.6376560122, 2.026673327  
Si, 2.2267822669, -0.6657239317, 0.  
Si, 0.8107574351, -2.729631891, 0.

**iso5 singlet**

Nb, -0.3152394566, 0.2572255096, 0.8965791819  
Si, -2.1755250679, -1.5014173157, 0.3364422897  
Si, -1.1978848929, 2.501250376, -0.0914483441  
Si, -0.2358371967, -1.0235741001, -1.5773210427  
Si, 1.7550972007, 0.2841905282, -1.3475439976  
Si, 2.2168091721, 0.8049339039, 1.0847259068  
Si, -0.3409544002, -2.926721189, -0.0222861171  
Si, 1.1919775547, 2.459557928, -0.3421467857  
Si, 1.5695799785, -1.4887926968, 0.4747907618  
Si, 3.7211436786, -0.7147835478, -0.2146455332  
Si, -3.6876164701, 0.2207529392, 0.2820965895  
Si, -1.9294291003, 0.5896106644, -1.2607819091

**Table S12.** Cartesian coordinates (in Å) of the five low-lying isomers of  $\text{Si}_{12}\text{Nb}^+$ .

**iso1 singlet**

Nb, -0.4828830119, -0.0779999508, 0.  
Si, -0.4353156461, 0.1270319621, 2.6037393761  
Si, -1.3536637952, -2.5451384424, 0.  
Si, 1.3727582926, 1.3387690517, 1.7189614093

Si, 1. 3727582926, 1. 3387690517, -1. 7189614093  
Si, -0. 1661791476, -2. 3011116582, -1. 980402327  
Si, 0. 5552276446, 2. 8024988857, 0.  
Si, -1. 365021731, 2. 0831533415, 1. 3216352004  
Si, -0. 1661791476, -2. 3011116582, 1. 980402327  
Si, 2. 165750707, -0. 129982121, 0.  
Si, 1. 2677450421, -2. 4036430757, 0.  
Si, -0. 4353156461, 0. 1270319621, -2. 6037393761  
Si, -1. 365021731, 2. 0831533415, -1. 3216352004

#### iso2 singlet

Nb, 0. 1778008686, -0. 0194699736, -0. 7039607246  
Si, 1. 4140592603, -2. 3079861293, 0. 17691491  
Si, 0. 3210473053, -0. 9497388663, 2. 0384591843  
Si, 2. 5213855384, -0. 7370140913, -1. 5167575325  
Si, -3. 9371635992, 0. 4648964242, 0. 2549432088  
Si, -1. 0467357955, -2. 4149360276, -0. 172651143  
Si, 2. 2350963246, 1. 597089021, -0. 6383056639  
Si, 0. 2212467464, 2. 8981813046, -0. 0678986424  
Si, -2. 2773510743, -0. 5738611833, -1. 378936404  
Si, -1. 8058081207, 1. 5674001443, -0. 3245404813  
Si, 2. 7899288066, -0. 2425860412, 0. 8841392596  
Si, -1. 9245886349, -0. 5322939674, 1. 1599384065  
Si, 0. 9573833743, 1. 3091103859, 1. 6419936225

#### iso3 singlet

Nb, -0. 6809410054, 0. 043951239, 0.  
Si, 1. 8214524656, 1. 4987477349, 0.  
Si, 0. 0299649516, 2. 3307176565, -1. 4242950311  
Si, 1. 7001803528, -0. 4303002375, 1. 5138812532  
Si, -0. 0881539144, 0. 3536459637, 2. 8420557004  
Si, -1. 8190068657, 2. 5169433746, 0.  
Si, -1. 2090773566, -2. 9691698801, 0.  
Si, -0. 0881539144, 0. 3536459637, -2. 8420557004  
Si, 1. 7001803528, -0. 4303002375, -1. 5138812532  
Si, 1. 2037519323, -2. 2117660144, 0.  
Si, -0. 6407916849, -1. 7412868599, 1. 9568836488  
Si, -0. 6407916849, -1. 7412868599, -1. 9568836488  
Si, 0. 0299649516, 2. 3307176565, 1. 4242950311

#### iso4 singlet

Nb, 0. 7000422362, -1. 1331038154, 0. 708060256  
Si, -2. 4548775302, 0. 2171137674, 3. 2559156987  
Si, 0. 0987200769, -0. 9636844775, -1. 7575601326  
Si, -1. 5868273167, -1. 6599153926, 1. 8274459477  
Si, 1. 9553996328, -0. 2037402956, -3. 2222276068

Si, 1.6437105954, 0.7937021141, -1.0435458675  
Si, 2.2368018561, 0.4447047513, 2.7083901474  
Si, -0.0860316726, -0.2070331839, 3.0330095198  
Si, 3.2226848473, -0.1095178472, 0.5864555101  
Si, 2.391267595, -1.722821244, -1.1911729691  
Si, -1.9866156769, -0.919384362, -0.5003086245  
Si, 0.8868059114, 1.6836476066, 1.0491849023  
Si, -1.4104535548, 0.8375313788, 1.0621662184

**iso5 singlet**

Nb, 0.1303395418, 0.3006625016, 0.3653278116  
Si, 0.1555280278, -0.3383350859, 3.3452348762  
Si, -1.911609143, -1.2591040017, -1.6986211663  
Si, 1.5921619441, -1.4118492931, -1.1216165138  
Si, -1.1408116682, -1.517229985, 1.7514223284  
Si, -0.3613722721, -2.5139510831, -0.277051199  
Si, -1.8954981657, 0.2665752803, -3.5416011486  
Si, 1.9323271532, -1.4732639894, 2.2797795928  
Si, 1.8390530729, 1.1198111146, 2.1357955465  
Si, 0.1951321337, 0.1152266401, -2.2616344583  
Si, 2.8817043483, -0.2608003433, 0.4744776976  
Si, -2.6182058833, -0.2568193562, 0.3632332324  
Si, -1.6275590893, 1.355655601, -1.2407495996
